# Supplementary material for: Initial employment of di-2-pyridyl ketone as a route to nickel(ii)/lanthanide(iii) clusters: triangular Ni2Ln complexes
Source: Royal Society of Chemistry journal article supplement (doi:10.1039/c0dt00493f), 2010-01-01
Supplement: c0dt00493f.pdf [file c0dt00493f.pdf]

## ESI

### Initial employment of di-2-pyridyl ketone as a route to nickel(II)/lanthanide(III) clusters : triangular Ni<sub>2</sub>Ln complexes

Constantinos G. Efthymiou,<sup>a</sup> Anastasia N. Georgopoulou,<sup>b</sup> Constantina Papatriantafyllopoulou,<sup>a</sup> Aris Terzis,<sup>b</sup> Catherine P. Raptopoulou,<sup>b</sup> Albert Escuer,<sup>\*,c</sup> and Spyros P. Perlepes<sup>\*,a</sup>

<sup>a</sup> Department of Chemistry, University of Patras, 265 04, Patras, Greece. E-mail : perlepes@patreas.upatras.gr; Tel: +30 2610 997146

<sup>b</sup> Institute of Materials Science, NCSR "Demokritos", 153 10, Aghia Paraskevi Attikis, Greece

<sup>c</sup> Departament de Química Inorganica, Universitat de Barcelona, Martí Franqués 1-11, Barcelona, 08028, Spain. E-mail: albert.escuer@qi.ub.es; Tel: +34 93 4039138

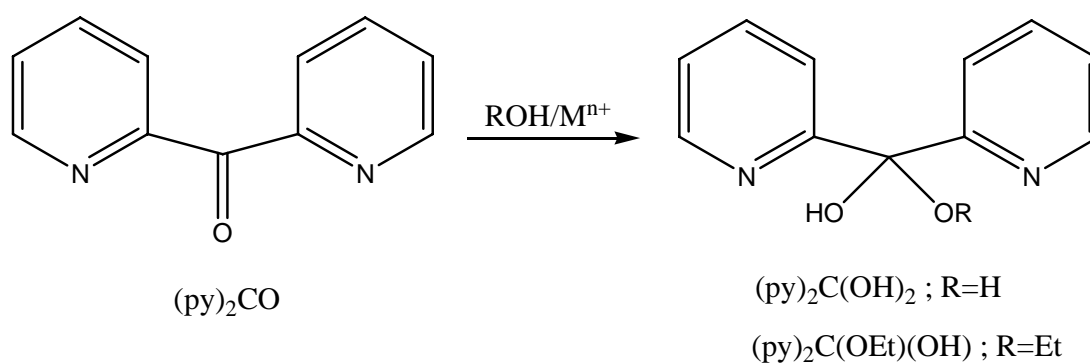

**Fig. S1** Di-2-pyridyl ketone-based ligands discussed in the text of the Communication. Note that (py)<sub>2</sub>C(OR)(OH) and their anions do not exist as free species but exist only in their respective metal complexes (M<sup>n+</sup> = metal ion; n = 2 or 3).

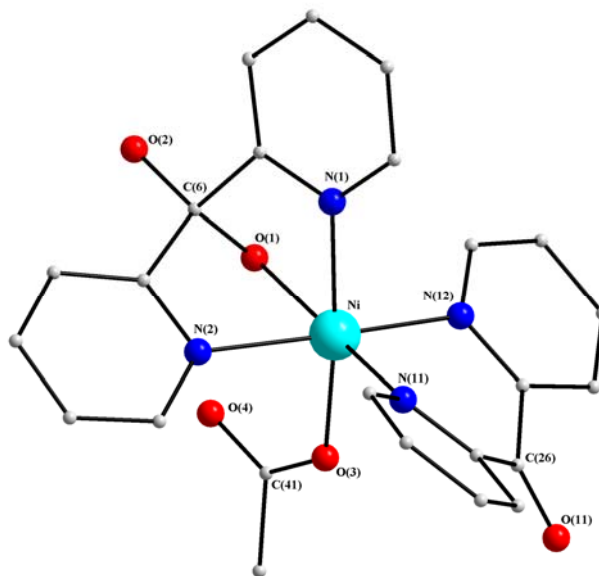

**Fig. S2** The cation  $[\text{Ni}(\text{O}_2\text{CMe})\{(\text{py})_2\text{CO}\}\{(\text{py})_2\text{C}(\text{OH})_2\}]^+$  that is present in the mononuclear precursor **5**.

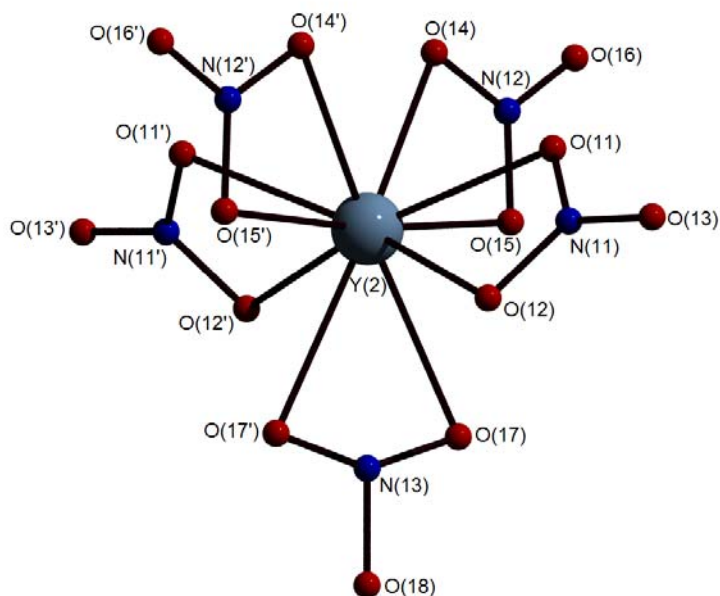

**Fig. S3** Structure of the  $[\text{Y}(\text{NO}_3)_5]^{2-}$  anion that is present in complex **3**. A 2-fold rotation axis passes through Y(2), N(13) and O(18). Unprimed and primed atoms are related by the symmetry operation  $-x, y, \frac{1}{2}-z$ .

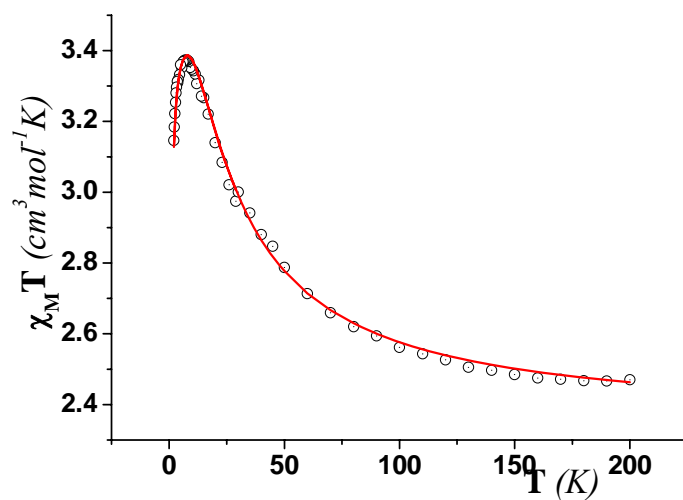

**Fig. S4** Plot of  $\chi_M T$  as a function of  $T$  for complex **3**; the solid line represents the best fit of the data.

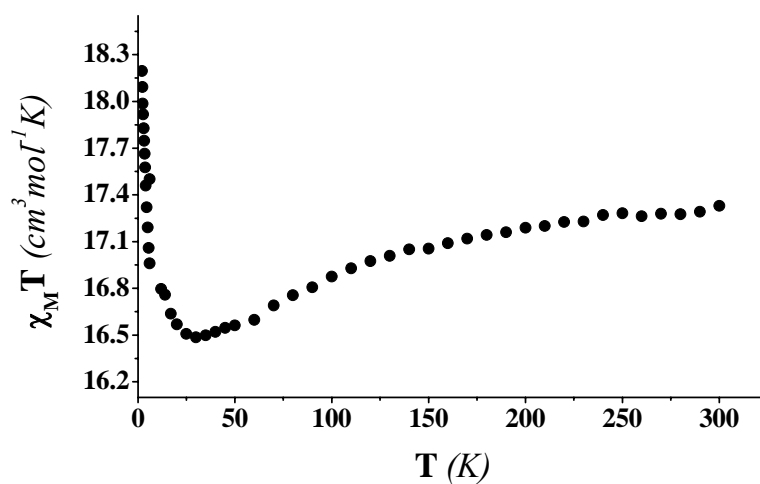

**Fig. S5** Plot of  $\chi_M T$  as a function of  $T$  for complex **1**.

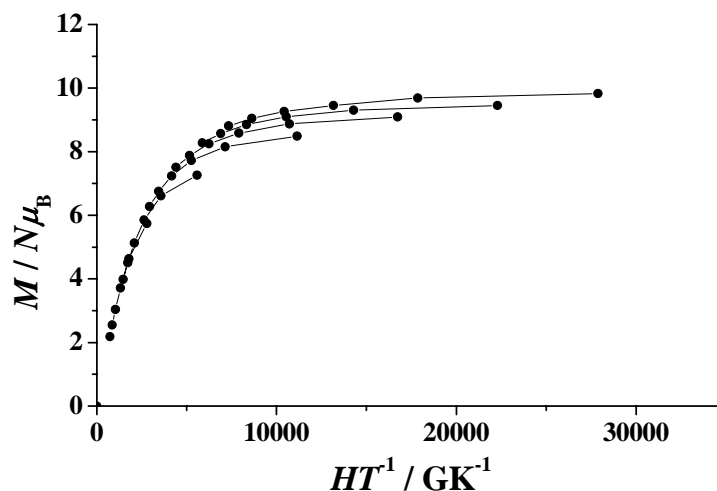

**Fig. S6** Plots of the reduced magnetization,  $M/N\mu_B$ , vs  $HT^{-1}$  for complex **1** in the field range 0-5 T. Data were measured for 1 K increments between 1.8 and 6.8 K.

## Syntheses

All manipulations were performed under aerobic conditions using reagents and solvents as received.

**$[\text{Ni}_2\text{Tb}\{(\text{py})_2\text{C}(\text{OEt})\text{O}\}_3\{(\text{py})_2\text{C}(\text{OH})\text{O}\}(\text{NO}_3)(\text{H}_2\text{O})](\text{ClO}_4)_2 \cdot 2.3\text{EtOH}$  (**1**·2.3EtOH).**  
Solid  $(\text{py})_2\text{CO}$  (0.111 g, 0.60 mmol) was added to a green solution of  $\text{Ni}(\text{ClO}_4)_2 \cdot 6\text{H}_2\text{O}$  (0.109 g, 0.30 mmol) in EtOH (15 mL). The solid soon dissolved to give a brown-red solution. Solid  $\text{NaO}_2\text{CMe} \cdot 3\text{H}_2\text{O}$  (0.041 g, 0.30 mmol) and solid  $\text{Tb}(\text{NO}_3)_3 \cdot 6\text{H}_2\text{O}$  (0.046 g, 0.10 mmol) were then added sequentially. The resulting solution was stirred under mild heating for 25 min, during which time the colour changed to green. The green solution was allowed to stand undisturbed in a closed flask for a period of 1 week. Emerald green

prismatic crystals appeared which were collected by filtration, washed with Et<sub>2</sub>O (2x3 mL) and dried in air. Yield, 75%. The dried solid analyzed as solvent free. Anal. Calc. for C<sub>50</sub>H<sub>50</sub>Ni<sub>2</sub>TbN<sub>9</sub>O<sub>20</sub>Cl<sub>2</sub> : C, 41.58; H, 3.50; N, 8.73. Found : C, 41.70; H, 3.40; N, 8.59%. IR data (KBr, cm<sup>-1</sup>): 3388 sb, 2978 m, 2936 w, 2896 w, 1604 s, 1572 m, 1470 s, 1440 s, 1384 s, 1314 s, 1224 s, 1136 s, 1090 s, 1056 s, 902 w, 774 m, 686 m, 638 m, 626 m, 544 w, 476 m.

**[Ni<sub>2</sub>Gd{(py)<sub>2</sub>C(OEt)O}<sub>3</sub>{(py)<sub>2</sub>C(OH)O}(NO<sub>3</sub>)(H<sub>2</sub>O)](ClO<sub>4</sub>)<sub>2</sub>·2.3EtOH (2·2.3EtOH).** Solid (py)<sub>2</sub>CO (0.147 g, 0.80 mmol) was added to a green solution of Ni(ClO<sub>4</sub>)<sub>2</sub>·6H<sub>2</sub>O (0.146 g, 0.40 mmol) in EtOH (15 mL). The solid dissolved immediately followed by an abrupt colour change to brown-red. Solid LiOH·H<sub>2</sub>O (0.017 g, 0.40 mmol) and solid Gd(NO<sub>3</sub>)<sub>3</sub>·6H<sub>2</sub>O (0.063 g, 0.14 mmol) were then added sequentially. The resulting solution was stirred under mild heating for 25 min, during which time the colour changed to green. The green solution was allowed to stand undisturbed in a closed flask for a period of 1 week. Emerald green prismatic crystals appeared which were collected by filtration, washed with Et<sub>2</sub>O (2x3 mL) and dried in air. Yield, 75%. The dried solid analyzed as solvent free. Anal. Calc. for C<sub>50</sub>H<sub>50</sub>Ni<sub>2</sub>GdN<sub>9</sub>O<sub>20</sub>Cl<sub>2</sub> : C, 41.63; H, 3.50; N, 8.74. Found : C, 41.58; H, 3.40; N, 8.88%. IR data (KBr, cm<sup>-1</sup>): 3388 sb, 2978 m, 2936 w, 2896 w, 1604 s, 1573 m, 1469 s, 1440 s, 1384 s, 1313 s, 1224 s, 1136 s, 1090 s, 1055 s, 902 w, 775 m, 686 m, 638 m, 625 m, 542 w, 475 m.

**[Ni<sub>2</sub>Y{(py)<sub>2</sub>C(OEt)O}<sub>4</sub>(NO<sub>3</sub>)(H<sub>2</sub>O)]<sub>2</sub>[Y(NO<sub>3</sub>)<sub>5</sub>](ClO<sub>4</sub>)<sub>2</sub>·2.6EtOH·3H<sub>2</sub>O (3·2.6EtOH·3H<sub>2</sub>O).** Solid Y(NO<sub>3</sub>)<sub>3</sub>·6H<sub>2</sub>O (0.039 g, 0.10 mmol) was added to a brown solution of [Ni(O<sub>2</sub>CMe){(py)<sub>2</sub>CO}{(py)<sub>2</sub>C(OH)<sub>2</sub>}] (ClO<sub>4</sub>) (**5**, 0.060 g, 0.10 mmol) in EtOH (20 mL). The solid dissolved immediately and the resulting solution was stirred under mild heating for 30 min. During the stirring period the colour of the solution changed gradually to green. The green solution was allowed to stand undisturbed in a closed flask for a period of 1 week. Emerald green prismatic crystals appeared which were collected by filtration, washed with Et<sub>2</sub>O (2x3 mL) and dried in air. Yield, 70%.

The dried solid analyzed as EtOH-free (**3**·3H<sub>2</sub>O). Anal. Calc. for C<sub>104</sub>H<sub>114</sub>Ni<sub>4</sub>Y<sub>3</sub>N<sub>23</sub>O<sub>50</sub>Cl<sub>2</sub> : C, 40.83; H, 3.76; N, 10.53. Found : C, 40.94; H, 3.63; N, 10.60%. IR data (KBr, cm<sup>-1</sup>): 3394 sb, 2974 m, 2930 w, 2896 w, 1604 m, 1570 w, 1472 s, 1442 m, 1384 s, 1316 s, 1224 m, 1089 s, 1054 s, 904 w, 780 m, 686 m, 636 m, 626 m, 542 w, 474 m.

**[Ni<sub>2</sub>Dy{(py)<sub>2</sub>C(OEt)O}<sub>4</sub>(NO<sub>3</sub>)(H<sub>2</sub>O)]<sub>2</sub>[Dy(NO<sub>3</sub>)<sub>5</sub>](ClO<sub>4</sub>)<sub>2</sub>·2.6EtOH·3H<sub>2</sub>O (4·2.6EtOH·3H<sub>2</sub>O).** Solid Dy(NO<sub>3</sub>)<sub>3</sub>·6H<sub>2</sub>O (0.046 g, 0.10 mmol) was added to a brown solution of [Ni(O<sub>2</sub>CMe){(py)<sub>2</sub>CO}{(py)<sub>2</sub>C(OH)<sub>2</sub>}] (ClO<sub>4</sub>) (**5**, 0.060 g, 0.10 mmol) in EtOH (15 mL). The solid dissolved immediately and the resulting solution was stirred under mild heating for 30 min. During the stirring period the colour of the solution changed gradually to green. The green solution was allowed to stand undisturbed for a period of 1 week. Emerald green prismatic crystals appeared which were collected by filtration, washed with Et<sub>2</sub>O (2x3 mL) and dried in air. Yield, 65%. The dried solid analyzed as **4**·2H<sub>2</sub>O. Anal. Calc. for C<sub>104</sub>H<sub>112</sub>Ni<sub>4</sub>Dy<sub>3</sub>N<sub>23</sub>O<sub>49</sub>Cl<sub>2</sub> : C, 38.29; H, 3.47; N, 9.88. Found : C, 38.40; H, 3.51; N, 10.01%. IR data (KBr, cm<sup>-1</sup>): 3394 sb, 2974 m, 2930 w, 2897 w, 1604 m, 1570 w, 1472 s, 1443 m, 1384 s, 1316 s, 1225 m, 1090 s, 1054 s, 904 w, 780 m, 686 m, 635 m, 625 m, 542 w, 472 m.
